# Supplementary material for: Radiofrequency Ablation versus Surgical Resection in Elderly Hepatocellular Carcinoma: A Systematic Review and Meta-Analysis
Source: MDPI journal article supplement (doi:10.3390/curroncol31010021), 2024-01-06
Supplement: s1 [file s1]

## Supplementary Material

### Table of Contents

|                                                    |           |
|----------------------------------------------------|-----------|
| <b>I. Supplementary Materials and Methods.....</b> | <b>2</b>  |
| Search strategy and results                        |           |
| Risk of bias                                       |           |
| <b>II. Supplementary Table.....</b>                | <b>8</b>  |
| <b>III. Supplementary Figures.....</b>             | <b>14</b> |
| <b>IV. References.....</b>                         | <b>20</b> |

## I. Supplementary Materials and Methods

### 1. Search strategy and results

#### (1) Summary of search results

| No.                                                   | DB           | Results     | Duplication |
|-------------------------------------------------------|--------------|-------------|-------------|
| 1                                                     | Ovid-MEDLINE | 94          |             |
| 2                                                     | Ovid-EMBASE  | 1159        |             |
| 3                                                     | CENTRAL      | 113         |             |
| 4                                                     | KoreaMed     | 53          | 497         |
| 5                                                     | KMBASE       | 34          |             |
| 6                                                     | KISS         | 313         |             |
| Number of Search Results (including duplication)      |              | 1766        |             |
| <b>Number of Search Results (without duplication)</b> |              | <b>1269</b> |             |

#### (2) Keywords

##### (A) International database

##### 1) Ovid-MEDLINE

| PICO               | No. | Searches                                                                                                                                                              |
|--------------------|-----|-----------------------------------------------------------------------------------------------------------------------------------------------------------------------|
| Patients<br>(HCC)  | 1   | exp Carcinoma, Hepatocellular/co, dt, et, mo, rt, su, th [Complications, Drug Therapy, Etiology, Mortality, Radiotherapy, Surgery, Therapy]                           |
|                    | 2   | ((hepat* or liver) adj5 (neoplas* or cancer* or carcin* or tumo?r* or malignan*)).ti,ab.                                                                              |
|                    | 3   | 1 or 2                                                                                                                                                                |
| Patients (elderly) | 4   | exp Aged/                                                                                                                                                             |
|                    | 5   | (advanced years or ageing or aging or aged or elder* or old* or frail* or geriatric* or gerontolog* or oncogeriat* or senior adult* or senium or octogenarian).ti,ab. |
|                    | 6   | 4 or 5                                                                                                                                                                |
| Patients           | 7   | 3 and 6                                                                                                                                                               |
| Intervention       | 8   | exp Hepatectomy/                                                                                                                                                      |
|                    | 9   | (liver or hepat* or segment*) adj5 (surgical or surger* or resect* or trans?ection* or operat* or excis* or extirpate* or segmentectom*).ti,ab.                       |
|                    | 10  | hepatectom*.ti,ab.                                                                                                                                                    |
|                    | 11  | or/8-10                                                                                                                                                               |
| Patients &         | 12  | 7 and 11                                                                                                                                                              |

|                                             |    |                                                                                                                                                                                                                                                                                                                                                                                                                                                                                                                                                                                                                                                                                                                 |
|---------------------------------------------|----|-----------------------------------------------------------------------------------------------------------------------------------------------------------------------------------------------------------------------------------------------------------------------------------------------------------------------------------------------------------------------------------------------------------------------------------------------------------------------------------------------------------------------------------------------------------------------------------------------------------------------------------------------------------------------------------------------------------------|
| Intervention                                |    |                                                                                                                                                                                                                                                                                                                                                                                                                                                                                                                                                                                                                                                                                                                 |
| Patients & Intervention<br>(Human<br>study) | 13 | Animals/                                                                                                                                                                                                                                                                                                                                                                                                                                                                                                                                                                                                                                                                                                        |
|                                             | 14 | Human/                                                                                                                                                                                                                                                                                                                                                                                                                                                                                                                                                                                                                                                                                                          |
|                                             | 15 | 13 not 14                                                                                                                                                                                                                                                                                                                                                                                                                                                                                                                                                                                                                                                                                                       |
|                                             | 16 | 12 not 15                                                                                                                                                                                                                                                                                                                                                                                                                                                                                                                                                                                                                                                                                                       |
| SD(RCT)<br>*SIGN filter                     | 17 | (Randomized Controlled Trials as Topic/ or randomized controlled trial/ or Random Allocation/ or Double Blind Method/ or Single Blind Method/ or clinical trial/ or clinical trial, phase i.pt. or clinical trial, phase ii.pt. or clinical trial, phase iii.pt. or clinical trial, phase iv.pt. or controlled clinical trial.pt. or randomized controlled trial.pt. or multicenter study.pt. or clinical trial.pt. or exp Clinical Trials as topic/ or (clinical adj trial\$.tw. or ((singl\$ or doubl\$ or treb\$ or tripl\$) adj (blind\$3 or mask\$3)).tw. or PLACEBOS/ or placebo\$.tw. or randomly allocated.tw. or (allocated adj2 random\$.tw.) not (case report.tw. or letter/ or historical article/) |
| SD<br>(Observational study)<br>*SIGN filter | 18 | Epidemiologic Studies/ or exp Case Control Studies/ or exp Cohort Studies/ or Case-control.tw. or (cohort adj (study or studies)).tw. or Cohort analy\$.tw. or (Follow up adj (study or studies)).tw. or (observational adj (study or studies)).tw. or Longitudinal.tw. or Retrospective.tw. or Cross sectional.tw. or Cross-sectional studies/                                                                                                                                                                                                                                                                                                                                                                 |
| SD total                                    | 19 | 17 or 18                                                                                                                                                                                                                                                                                                                                                                                                                                                                                                                                                                                                                                                                                                        |
| P & I (human study) &<br>SD(RCT,<br>cohort) | 20 | 16 and 19                                                                                                                                                                                                                                                                                                                                                                                                                                                                                                                                                                                                                                                                                                       |
| SD (exclusion study<br>design<br>)          | 21 | Case Study/ or case report.tw. or letter/ or<br>Editorial.pt. or review.pt.                                                                                                                                                                                                                                                                                                                                                                                                                                                                                                                                                                                                                                     |
| Total                                       | 22 | 20 not 21                                                                                                                                                                                                                                                                                                                                                                                                                                                                                                                                                                                                                                                                                                       |

## 2) Ovid-EMBASE

|                | No. | Searches                                                                                                                                                                             |
|----------------|-----|--------------------------------------------------------------------------------------------------------------------------------------------------------------------------------------|
|                | 1   | exp liver cancer/co, dm, dr, dt, et, rt, si, su, th [Complication, Disease Management, Drug Resistance, Drug Therapy, Etiology, Radiotherapy, Side Effect, Surgery, Therapy]         |
| Patients (HCC) | 2   | exp liver cell carcinoma/co, dm, dr, dt, et, rt, si, su, th [Complication, Disease Management, Drug Resistance, Drug Therapy, Etiology, Radiotherapy, Side Effect, Surgery, Therapy] |

|                                                    |    |                                                                                                                                                                                                                                                                                                                                                                                                                                                                                                                                                                                                                                                                |
|----------------------------------------------------|----|----------------------------------------------------------------------------------------------------------------------------------------------------------------------------------------------------------------------------------------------------------------------------------------------------------------------------------------------------------------------------------------------------------------------------------------------------------------------------------------------------------------------------------------------------------------------------------------------------------------------------------------------------------------|
|                                                    | 3  | ((hepat* or liver) adj5 (neoplas* or cancer* or carcin* or tumo?r* or malignan*)).ti,ab.                                                                                                                                                                                                                                                                                                                                                                                                                                                                                                                                                                       |
|                                                    | 4  | 1 or 2 or 3                                                                                                                                                                                                                                                                                                                                                                                                                                                                                                                                                                                                                                                    |
|                                                    | 5  | exp aged/                                                                                                                                                                                                                                                                                                                                                                                                                                                                                                                                                                                                                                                      |
| Patients (elderly)                                 | 6  | (advanced years or ageing or aging or aged or elder* or old* or frail* or geriatric* or gerontolog* or oncogeriat* or senior adult* or senium or octogenarian).ti,ab.                                                                                                                                                                                                                                                                                                                                                                                                                                                                                          |
|                                                    | 7  | 5 or 6                                                                                                                                                                                                                                                                                                                                                                                                                                                                                                                                                                                                                                                         |
| Patients                                           | 8  | 4 and 7                                                                                                                                                                                                                                                                                                                                                                                                                                                                                                                                                                                                                                                        |
| Intervention                                       | 9  | exp liver resection/                                                                                                                                                                                                                                                                                                                                                                                                                                                                                                                                                                                                                                           |
|                                                    | 10 | exp segmentectomy/                                                                                                                                                                                                                                                                                                                                                                                                                                                                                                                                                                                                                                             |
|                                                    | 11 | (liver or hepat* or segment*) adj5 (surgical or surger* or resect* or trans?ection* or operat* or excis* or extirpate* or segmentectom*).ti,ab.                                                                                                                                                                                                                                                                                                                                                                                                                                                                                                                |
|                                                    | 12 | hepatectom*.ti,ab.                                                                                                                                                                                                                                                                                                                                                                                                                                                                                                                                                                                                                                             |
|                                                    | 13 | or/9-12                                                                                                                                                                                                                                                                                                                                                                                                                                                                                                                                                                                                                                                        |
| Patients & Intervention                            | 14 | 8 and 13                                                                                                                                                                                                                                                                                                                                                                                                                                                                                                                                                                                                                                                       |
| Patients & Intervention<br>(Human study)           | 15 | Animals/                                                                                                                                                                                                                                                                                                                                                                                                                                                                                                                                                                                                                                                       |
|                                                    | 16 | Human/                                                                                                                                                                                                                                                                                                                                                                                                                                                                                                                                                                                                                                                         |
|                                                    | 17 | 15 not 16                                                                                                                                                                                                                                                                                                                                                                                                                                                                                                                                                                                                                                                      |
|                                                    | 18 | 14 not 17                                                                                                                                                                                                                                                                                                                                                                                                                                                                                                                                                                                                                                                      |
| SD(RCT)<br>*SIGN RCT<br>filter                     | 19 | (Clinical Trial/ OR Randomized Controlled Trial/ OR controlled clinical trial/ OR multicenter study/ OR Phase 3 clinical trial/ OR Phase 4 clinical trial/ OR exp RANDOMIZATION/ OR Single Blind Procedure/ OR Double Blind Procedure/ OR Crossover Procedure/ OR PLACEBO/ OR randomi?ed controlled trial\$.tw. OR rct.tw. OR (random\$ adj2 allocat\$).tw. OR single blind\$.tw. OR double blind\$.tw. OR ((treble or triple) adj blind\$).tw. OR placebo\$.tw. OR Prospective Study/) not (Case Study/ OR case report.tw. OR abstract report/ or letter/ OR Conference proceeding.pt. OR Conference abstract.pt. OR Editorial.pt. OR Letter.pt. OR Note.pt.) |
| SD<br>(Observational study)<br>*SIGN filter        | 20 | Clinical study/ OR Case control study OR Family study/ OR Longitudinal study/ OR Retrospective study OR (Prospective study/ not Randomized controlled trials/) OR Cohort analysis/ OR (Cohort adj (study or studies)).mp. OR (Case control adj (study or studies)).tw. OR (follow up adj (study or studies)).tw. OR (observational adj (study or studies)).tw. OR (epidemiologic\$ adj (study or studies)).tw. OR (cross sectional adj (study or studies)).tw.                                                                                                                                                                                                 |
| SD total                                           | 21 | 19 or 20                                                                                                                                                                                                                                                                                                                                                                                                                                                                                                                                                                                                                                                       |
| P & I (human study) &<br>SD(RCT,<br>observational) | 22 | 18 and 21                                                                                                                                                                                                                                                                                                                                                                                                                                                                                                                                                                                                                                                      |

|                            |    |                                                                                                                         |
|----------------------------|----|-------------------------------------------------------------------------------------------------------------------------|
| SD(exclusion study design) | 23 | Case Study/ or case report.tw. or conference abstract.pt. or abstract report/ or letter/ or Editorial.pt. or review.pt. |
| Total                      | 24 | 22 not 23                                                                                                               |

### 3) CENTRAL (Cochrane Central Register of Controlled Trials)

|                                       | No. | Searches                                                                                                                                                                                          |
|---------------------------------------|-----|---------------------------------------------------------------------------------------------------------------------------------------------------------------------------------------------------|
| Patients (HCC)                        | 1   | MeSH descriptor: [Liver Neoplasms] explode all trees and with qualifier(s): [complications - CO, drug therapy - DT, etiology - ET, mortality - MO, radiotherapy - RT, surgery - SU, therapy - TH] |
|                                       | 2   | ((hepat* or liver) near/5 (neoplas* or cancer* or carcin* or tumor* or malignan*)):ti,ab                                                                                                          |
|                                       | 3   | [1-#2-#2]                                                                                                                                                                                         |
| Patients (elderly)                    | 4   | MeSH descriptor: [Aged] explode all trees                                                                                                                                                         |
|                                       | 5   | (advanced years or ageing or aging or aged or elder* or old* or frail* or geriatric* or gerontolog* or oncogeriat* or senior adult* or senium or octogenarian):ti,ab                              |
|                                       | 6   | #4 or #5                                                                                                                                                                                          |
| Patients                              | 7   | #3 and #6                                                                                                                                                                                         |
| Intervention                          | 8   | MeSH descriptor: [Hepatectomy] explode all trees                                                                                                                                                  |
|                                       | 9   | (liver or hepat* or segment*) near/5 (surgical or surger* or resect* or trans?ection* or operat* or excis* or extirpate* or segmentectom*):ti,ab                                                  |
|                                       | 10  | hepatectom*:ti,ab                                                                                                                                                                                 |
|                                       | 11  | [1-#10-#10]                                                                                                                                                                                       |
| Patients & Intervention               | 12  | #7 and #11                                                                                                                                                                                        |
| Patients & Intervention (Human study) | 13  | MeSH descriptor: [Animals] this term only                                                                                                                                                         |
|                                       | 14  | MeSH descriptor: [Humans] this term only                                                                                                                                                          |
|                                       | 15  | #13 not #14                                                                                                                                                                                       |
|                                       | 16  | #12 not #15                                                                                                                                                                                       |
| Total                                 |     | Trials results                                                                                                                                                                                    |

### (B) Local database

#### 1) KoreaMed

|          | No | Searches                                                                                                    |
|----------|----|-------------------------------------------------------------------------------------------------------------|
| Patients | 1  | ((("liver cancer"[ALL])) OR ("hepatocellular carcinoma"[ALL]))                                              |
|          | 2  | ((("hepatic"[ALL])) OR ("liver"[ALL]))                                                                      |
|          | 3  | ((("cancer"[ALL]) OR ("neoplasms"[ALL]) OR ("tumor"[ALL]) OR ("carcinoma"[ALL]) OR ("malignant"[ALL]))      |
|          | 4  | 2 AND 3                                                                                                     |
|          | 5  | 1 OR 4                                                                                                      |
| Patients | 6  | ("ageing"[ALL]) OR ("aging"[ALL]) OR ("aged"[ALL]) OR ("elder"[ALL]) OR ("older"[ALL]) OR ("frail"[ALL]) OR |

|              |   |                                                                                                                                                                              |
|--------------|---|------------------------------------------------------------------------------------------------------------------------------------------------------------------------------|
|              |   | ("geriatric"[ALL]) OR ("gerontology"[ALL]) OR ("senior adult"[ALL]) OR ("senium"[ALL]) OR ("octogenarian"[ALL])                                                              |
| Intervention | 7 | ("surgical"[ALL]) OR ("surgery"[ALL]) OR ("resection"[ALL]) OR ("operation"[ALL]) OR ("excise"[ALL]) OR ("extirpate"[ALL]) OR ("segmentectomy"[ALL]) OR ("hepatectomy"[ALL]) |
| P&I          | 8 | 5 AND 6 AND 7                                                                                                                                                                |

## 2) KMBASE

|              | No | Searches                                                                       |
|--------------|----|--------------------------------------------------------------------------------|
| Patients     | 1  | ([ALL=hepatocellular carcinoma] OR [ALL=liver cancer])                         |
| Patients     | 2  | ((([ALL=aged] OR [ALL=aging]) OR [ALL=elderly]) OR [ALL=older])                |
| Intervention | 3  | ((([ALL=surgery] OR [ALL=resection]) OR [ALL=operation]) OR [ALL=hepatectomy]) |
| P&I          | 4  | 1 and 2 and 3                                                                  |
| Patients     | 5  | [ALL=간암] OR [ALL=간세포암종]                                                        |
| Patients     | 6  | ((([ALL=노인] OR [ALL=노령]) OR [ALL=고령]) OR [ALL=초고령])                            |
| Intervention | 7  | [ALL=간절제]                                                                      |
| P&I          | 8  | 5 and 6 and 7                                                                  |
|              | 9  | 4 OR 8                                                                         |

## 3) KISS

|              | No | Searches                                            |
|--------------|----|-----------------------------------------------------|
| Patients     | 1  | 전체 = liver cancer hepatocellular carcinoma 간암 간세포암종 |
| Patients     | 2  | 전체 = aging aged elderly                             |
|              | 3  | 전체 = 노인 노령 고령 초고령                                   |
| Intervention | 4  | 전체 = surgery resection operation hepatectomy 간절제    |
| P&I          | 5  | 1 AND 2 AND 4                                       |
|              | 6  | 1 AND 3 AND 4                                       |
|              | 7  | 5 + 6                                               |

## 2. Risk of bias

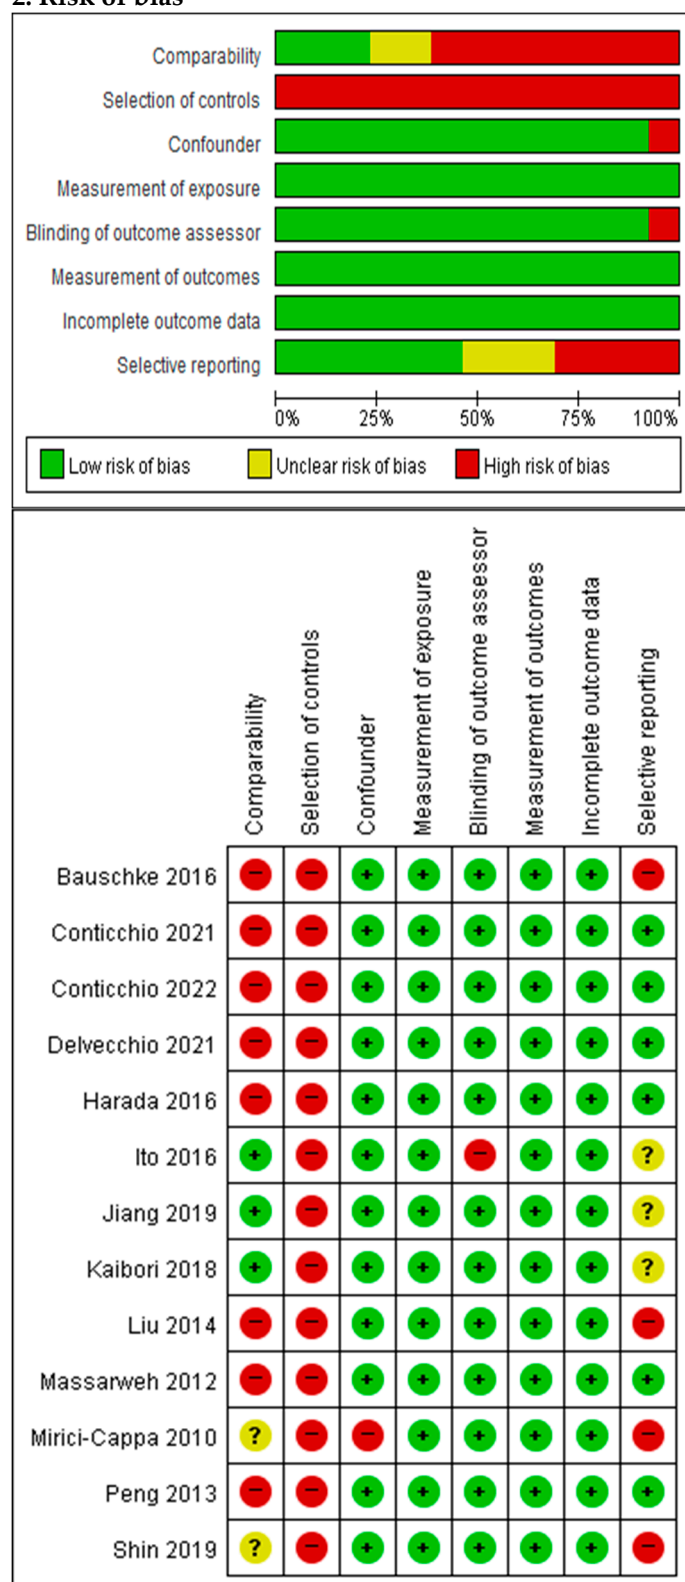

## II. Supplementary Tables

**Supplementary Table S1.** Detailed characteristics of studies included in the systematic review and meta-analysis

| Study              | RFA          |     |      |          |                     |                        |                     |                     |               | Surgery |       |       |          |                     |                        |                     |                     |                            |
|--------------------|--------------|-----|------|----------|---------------------|------------------------|---------------------|---------------------|---------------|---------|-------|-------|----------|---------------------|------------------------|---------------------|---------------------|----------------------------|
|                    | Intervention | n   | Age  | Male (%) | BCLC 0/A stage (%)  | Child Pugh class A (%) | Tumor size >3cm (%) | Multiple tumors (%) | cirrhosis (%) | Control | n     | Age   | Male (%) | BCLC 0/A stage (%)  | Child Pugh class A (%) | Tumor size >3cm (%) | Multiple tumors (%) | cirrhosis (%)              |
| Conticchio 2022[2] | RFA          | 58  | 74   | 64       | NA                  | 90                     | 2.0cm               | 0                   | 100           | LLR     | 58    | 75.4  | 76       | NA                  | 86                     | median 3.0cm        | 0                   | 100                        |
| Conticchio 2021[3] | RFA          | 136 | 75   | 72       | 100                 | 84                     | (>2cm) 74           | 14                  | 100           | LR      | 136   | 74.7  | 76       | 100                 | 85                     | (>2cm) 79           | 12                  | 100                        |
| Delvecchio 2021[4] | RFA          | 26  | 75   | 65       | NA                  | 100                    | 2.05cm              | 0                   | 100           | LR      | 26    | 74.26 | 62       | NA                  | 81                     | median 2.3cm        | 0                   | 100                        |
| Shin 2019[5]       | RFA          | 139 | NR   | NR       | 100                 | NR                     | NR                  | NR                  |               | SR      | 131   | NR    | NR       | 100                 | NR                     | NR                  | NR                  |                            |
| Jiang 2019[6]      | RFA          | 956 | NR   | 65.6     | NR                  | NR                     | 42                  | 17.7                | 21.5          | LR      | 956   | NR    | 66.3     | NR                  | NR                     | 45.7                | 17.2                | severe fibrosis or LC 18.9 |
| Kaibori 2018[7]    | RFA          | 461 | 77   | 62       | NR                  | 89                     | 0                   | 6                   | NR            | LR      | 461   | 77    | 61       | NR                  | 89                     | 0                   | 5                   | NR                         |
| Harada 2016[8]     | RFA          | 20  | 73   | 55       | 100                 | mean 5.5               | 1.6                 | mean 1.1            | NR            | LLR/OLR | 20/48 | 74/70 | 45/54    | 100                 | mean 5.2/5.6           | mean 1.8/2.3        | mean 1.1/1.3        | NR                         |
| Bauschke 2016[1]   | RFA          | 64  | NR   | NR       | NA                  | 78                     | NR                  | 38                  | 77            | LR      | 63    | NR    | NR       | NA                  | 95                     | NR                  | 22                  | 17                         |
| Ito 2016[9]        | RFA          | 27  | 71   | 55.6     | UICC stage I-II 100 | 96.3                   | 0                   | 22.2                | NR            | LR      | 27    | 69    | 59.3     | UICC stage I-II 100 | 96.3                   | 0                   | 7.4                 | NR                         |
| Liu 2014[10]       | RFA          | 139 | 79.6 | 67       | 69.1                | 64                     | vol mean 14 cm3     | 17.3                | NR            | SR      | 118   | 78.9  | 85       | 66.7                | 78.8                   | vol mean 171 cm3    | 17.8                | NR                         |
| Peng 2013[11]      | RFA          | 89  | 70.4 | 84.3     | NR                  | 87.6                   | 39.2                | 6.7                 | 100           | LR      | 91    | 68.7  | 84.6     | NR                  | 94.5                   | 34.1                | 14.3                | 100                        |



|                              |     |     |      |      |    |      |    |      |      |    |     |      |      |    |      |      |    |      |
|------------------------------|-----|-----|------|------|----|------|----|------|------|----|-----|------|------|----|------|------|----|------|
| Massarweh<br>2012[12]        | RFA | 206 | 74.7 | 63.1 | NR | NR   | 49 | 44.7 | 81.6 | LR | 209 | 75.7 | 61.2 | NR | NR   | 80.9 | 34 | 49.8 |
| Mirici-<br>Cappa<br>2010[13] | RFA | 119 | 74.4 | 68.9 | NR | 58.8 | NR | NR   | 97.5 | LR | 32  | 73.8 | 71.9 | NR | 71.9 | NR   | NR | 100  |

**Supplementary Table S2.** Comparison of overall survival, disease free survival between surgery and RFA group

| <b>Overall survival</b>      |                                       |               |                                          |               |                                          |               |
|------------------------------|---------------------------------------|---------------|------------------------------------------|---------------|------------------------------------------|---------------|
|                              | <b>Overall survival (months)</b>      |               | <b>3-year survival rate</b>              |               | <b>5-year survival rate</b>              |               |
|                              | RFA group                             | Surgery group | RFA group                                | Surgery group | RFA group                                | Surgery group |
| median                       | 60                                    | 60            | 65.0%                                    | 70.0%         | 53.8%                                    | 57.5%         |
| range                        | 15.5-85                               | 35.5-88.8     | 28.8%-78.5%                              | 47.5-80.2%    | 8.5%-65.5%                               | 37.3%-76.6%   |
| <b>Disease free survival</b> |                                       |               |                                          |               |                                          |               |
|                              | <b>Disease free survival (months)</b> |               | <b>3-year disease free survival rate</b> |               | <b>5-year disease free survival rate</b> |               |
|                              | RFA group                             | Surgery group | RFA group                                | Surgery group | RFA group                                | Surgery group |
| median                       | 26.3                                  | 31.0          | 62.7%                                    | 60.6%         | 30.3%                                    | 38.9%         |
| range                        | 20.4-42.3                             | 28.0-57.2     | 35.7%-75.3%                              | 39.3%-82.0%   | 16.3%-64.7%                              | 33.1%-77.4%   |

Abbreviations: RFA: radio frequency ablation

**Supplementary Table S3.** A meta-analysis of overall survival in the surgical group vs. RFA

| Group                       | No. of studies | Univariable analysis              |                |
|-----------------------------|----------------|-----------------------------------|----------------|
|                             |                | Pooled HR (95% CI) (random model) | I <sup>2</sup> |
| <b>Overall estimate</b>     | <b>10</b>      | <b>1.44 (1.22-1.70)</b>           | <b>81%</b>     |
| Using data                  |                |                                   |                |
| Calculated data             | 5              | 1.41 (1.09-1.82)                  | 84%            |
| Reported data               | 5              | 1.49 (1.21-1.84)                  | 66%            |
| Definition of elderly       |                |                                   |                |
| ≥ 65-70 years               | 9              | 1.43 (1.20-1.71)                  | 83%            |
| ≥ 75 years                  | 1              | 1.57 (1.12-2.20)                  | NA             |
| Publication year            |                |                                   |                |
| 2016-2022                   | 7              | 1.62 (1.32-1.98)                  | 64%            |
| 2010-2015                   | 3              | 1.19 (0.94-1.50)                  | 85%            |
| Country                     |                |                                   |                |
| Asia                        | 3              | 1.26 (0.86-1.87)                  | 84%            |
| Non-Asia                    | 7              | 1.54 (1.26-1.90)                  | 82%            |
| Risk of bias: comparability |                |                                   |                |
| Low risk                    | 4              | 1.49 (1.14-1.94)                  | 74%            |
| High or unclear risk        | 6              | 1.41 (1.14-1.75)                  | 81%            |

Abbreviations: No., number; NA, non-available; HR, hazard ratio; CI, confidence interval

**Supplementary Table S4.** Comparison of recurrence in RFA and surgical group

| Outcomes                                    | No of studies | No. of patients, RFA/surgery | Pooled OR | 95% CI     | I <sup>2</sup> | P of Chi <sup>2</sup> |
|---------------------------------------------|---------------|------------------------------|-----------|------------|----------------|-----------------------|
| <b>All</b>                                  |               |                              |           |            |                |                       |
| Total recurrence                            | 2             | 115/117                      | 0.79      | 0.47-1.32  | 0%             | 0.42                  |
| Local recurrence                            | 3             | 174/176                      | 4.90      | 2.16-11.08 | 0%             | 0.43                  |
| Intra-hepatic recurrence                    | 2             | 147/149                      | 0.62      | 0.38-1.00  | 0%             | 0.64                  |
| Extra-hepatic recurrence                    | 2             | 147/149                      | 0.67      | 0.11-4.21  | 0%             | 0.70                  |
| <b>Sensitivity analysis: HCC size ≤ 3cm</b> |               |                              |           |            |                |                       |
| Total recurrence                            | 1             | 26/26                        | 1.17      | 0.39-3.50  | NA             | NA                    |
| Local recurrence                            | 2             | 85/85                        | 5.96      | 1.91-18.64 | 13%            | 0.28                  |
| Intra-hepatic recurrence                    | 1             | 58/58                        | 0.52      | 0.22-1.23  | NA             | NA                    |
| Extra-hepatic recurrence                    | 1             | 58/58                        | 0.49      | 0.04-5.57  | NA             | NA                    |

Abbreviations: HCC, hepatocellular carcinoma; No., number; NA, non-available; OR, odds ratio; CI, confidence interval

**Supplementary Table S5.** Comparison of hospital stay in RFA and surgical group

| Study               | Country | Elderly definition | No. RFA/surgery | RFA Median (range), days     | Surgery Median (range), days    | P        |
|---------------------|---------|--------------------|-----------------|------------------------------|---------------------------------|----------|
| Conticchio, 2022[2] | Europe  | 70                 | 58/58 (LLR)     | 3 (1-15)                     | 5 (2-25)                        | 0.001    |
| Conticchio, 2021[3] | Europe  | 70                 | 136/136 (OLR)   | 2 (1-23)                     | 7 (1-203)                       | <0.001   |
| Harada, 2016[8]     | Japan   | NA                 | 20/20 (LLR)     |                              | 9 (7-14)                        | not sig  |
|                     |         |                    | 20/48 (OLR)     | 8 (2-14)                     | 15 (7-66)                       | <0.0001  |
| Ito, 2016[9]        | Japan   | NA                 | 27/27 (LR)      | mean 7.6<br>(95% CI 6.8-8.4) | mean 12.6<br>(95% CI 11.0-14.2) | <0.00003 |
| Peng, 2013[11]      | China   | 65                 | 89/91 (LR)      | mean 8.01, SD 2.70           | mean 13.5, SD 4.05              | <0.001   |

Abbreviations: LLR, laparoscopic liver resection. OLR, open liver resection; RFA, radiofrequency ablation; No., number; NA, non-available; CI, confidence interval; SD, standard deviation

### III. Supplementary Figures

#### Supplementary Figure S1. Funnel plots

(A) overall survival

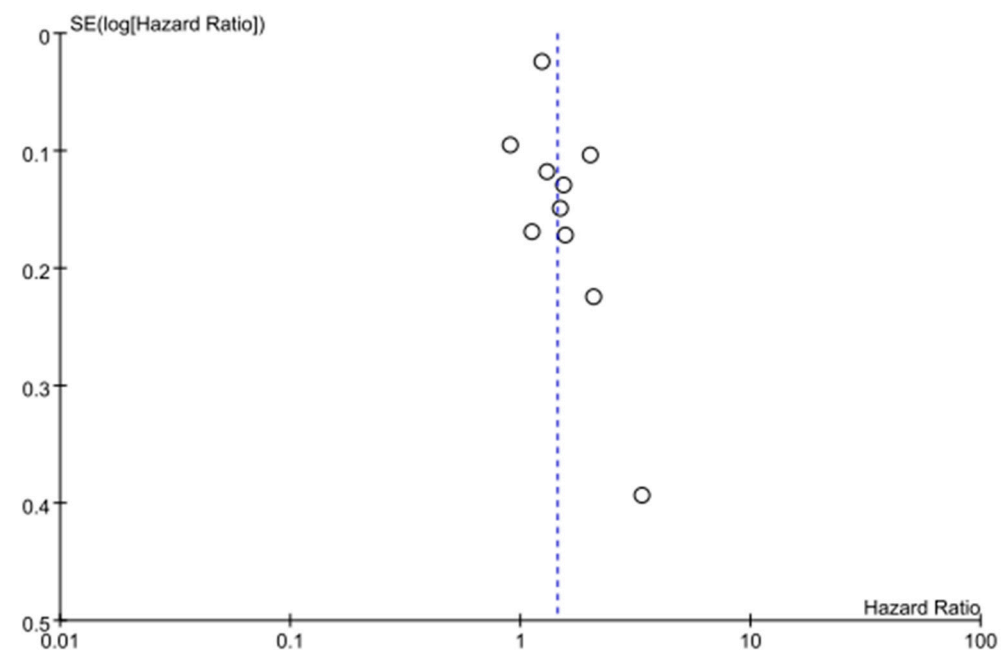

(B) disease free survival

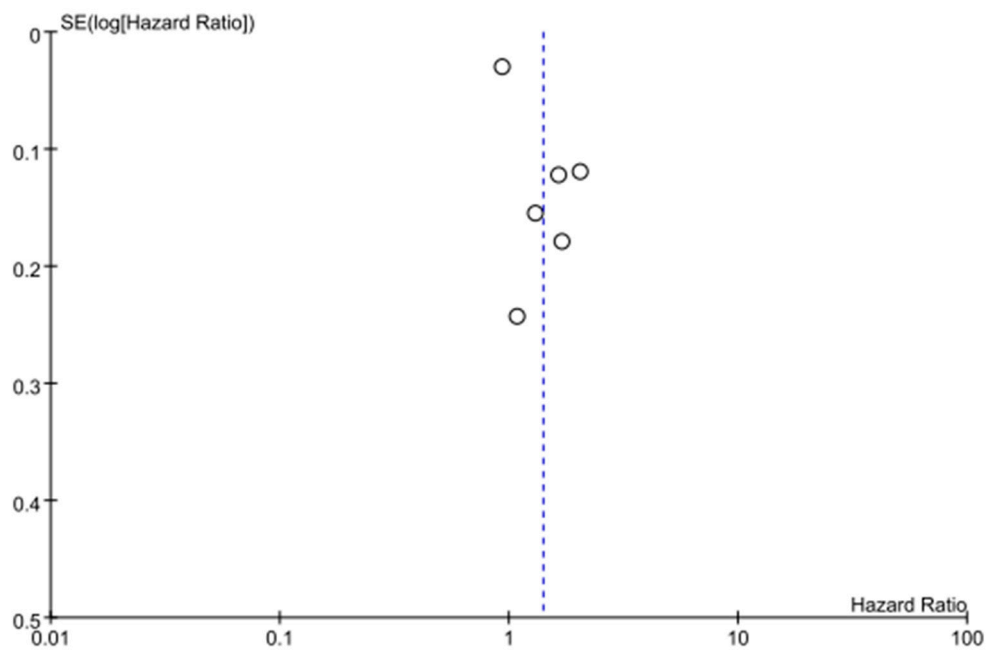

(C) recurrence

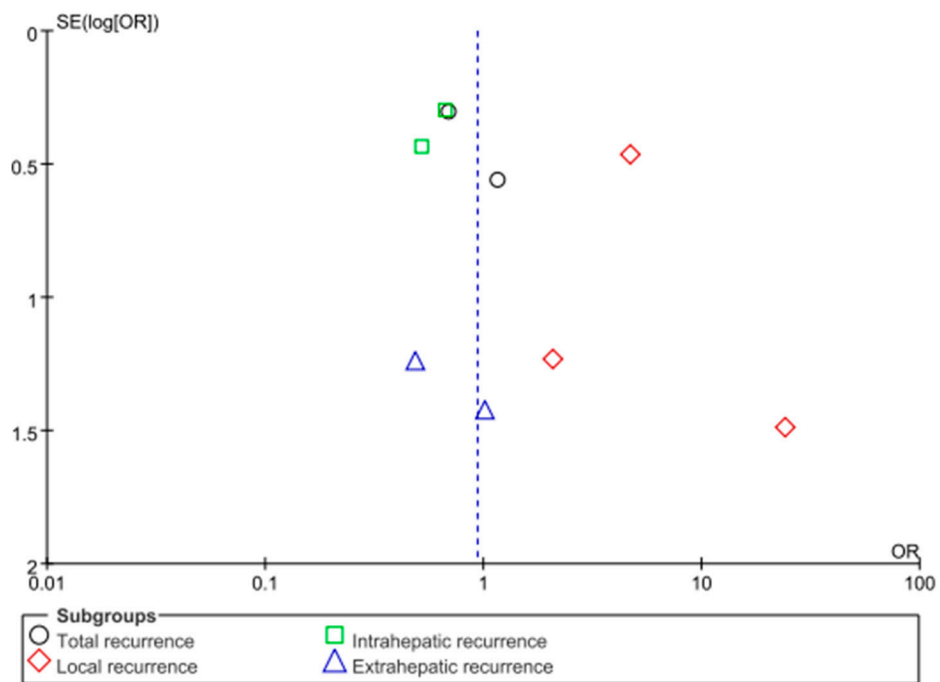

(D) adverse events

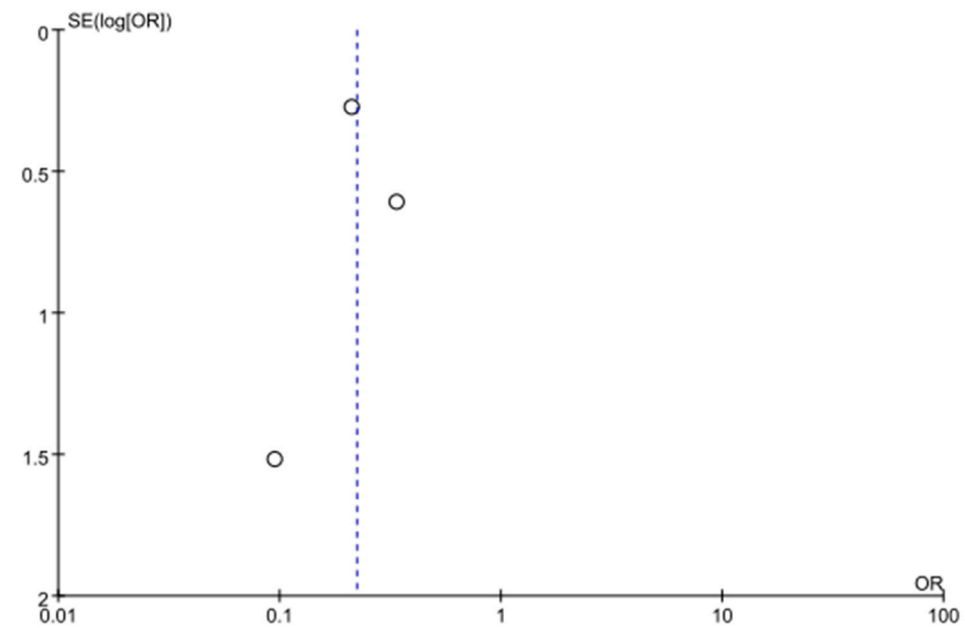

Supplementary Figure S2. Flow chart

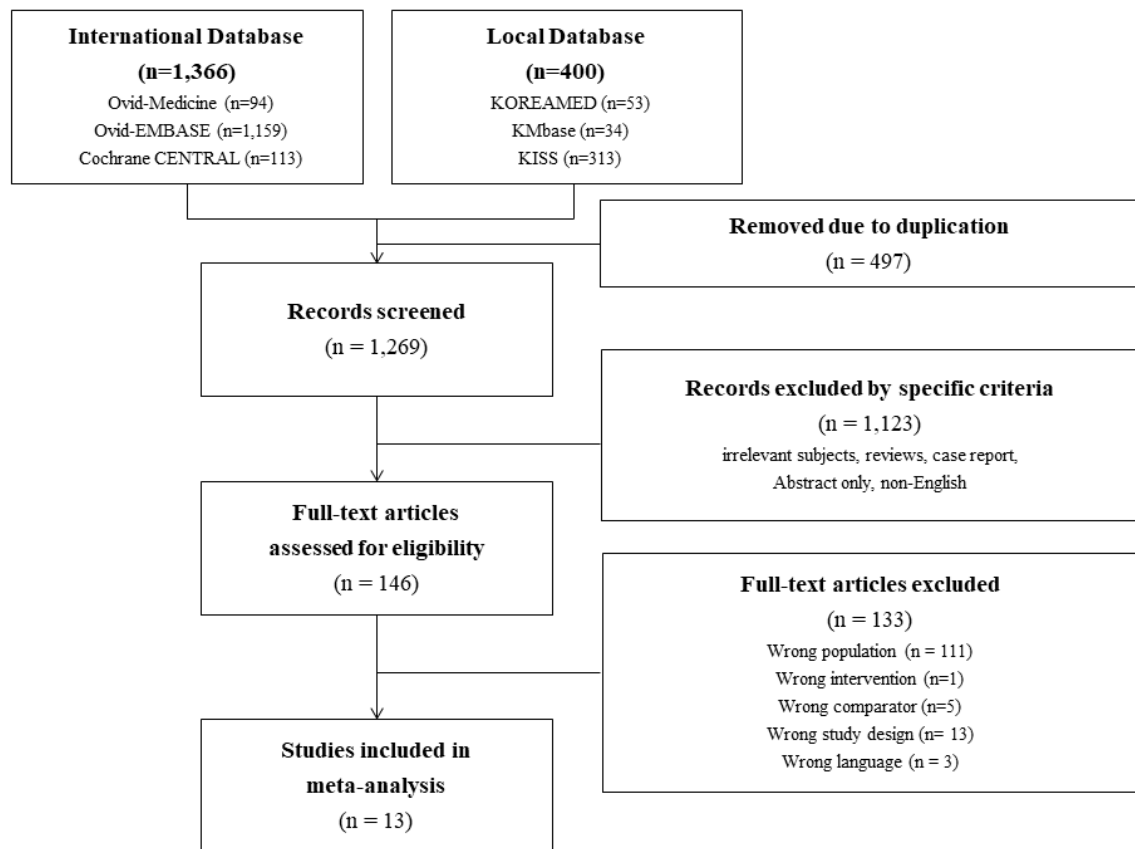



**Supplementary Figure S3.** Forest plot of recurrence rate  
(a) all, (b) sensitivity analysis ( $\leq 3\text{cm}$ )

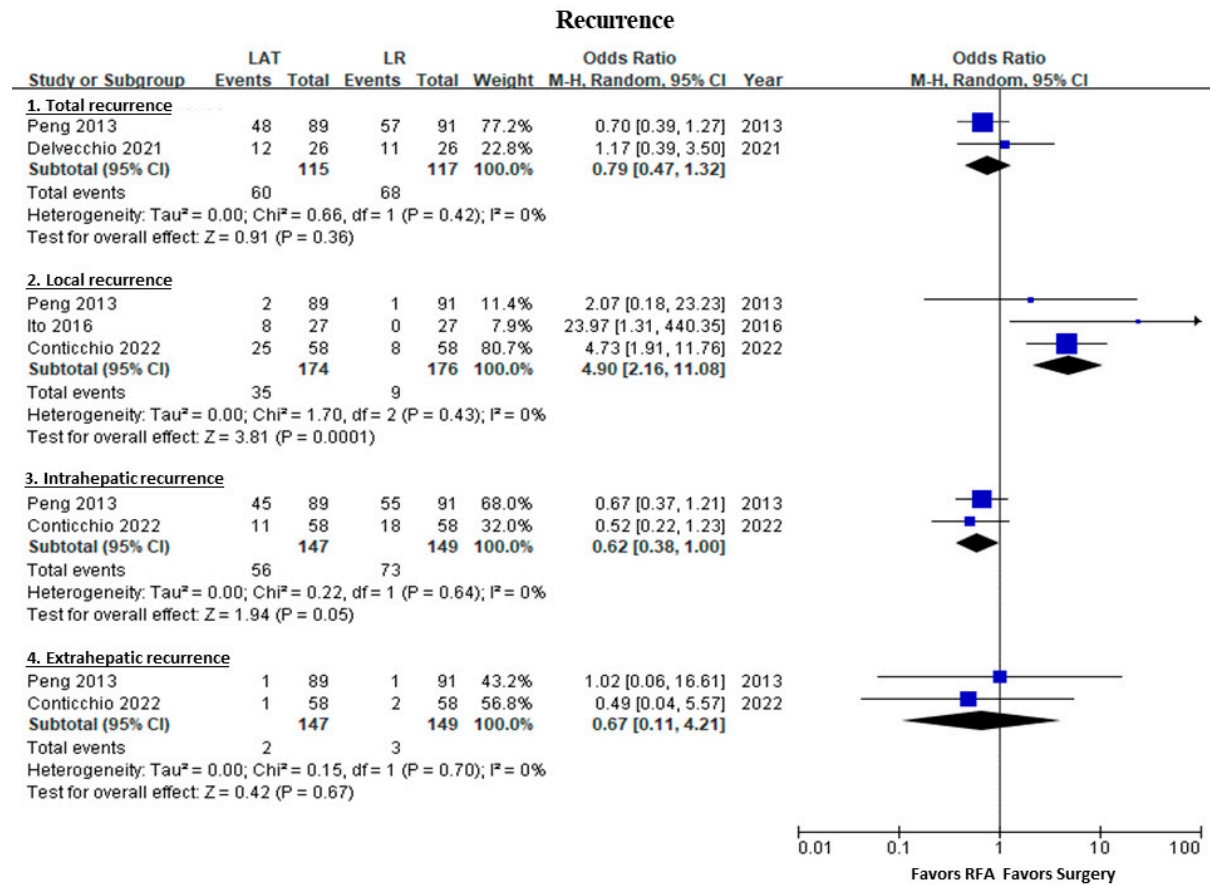

**Supplementary Figure S4.** Forest plot of hospital stay  
(a) all, (b) sensitivity analysis ( $\leq 3\text{cm}$ )

**Length of hospital stay**

**(A) All**

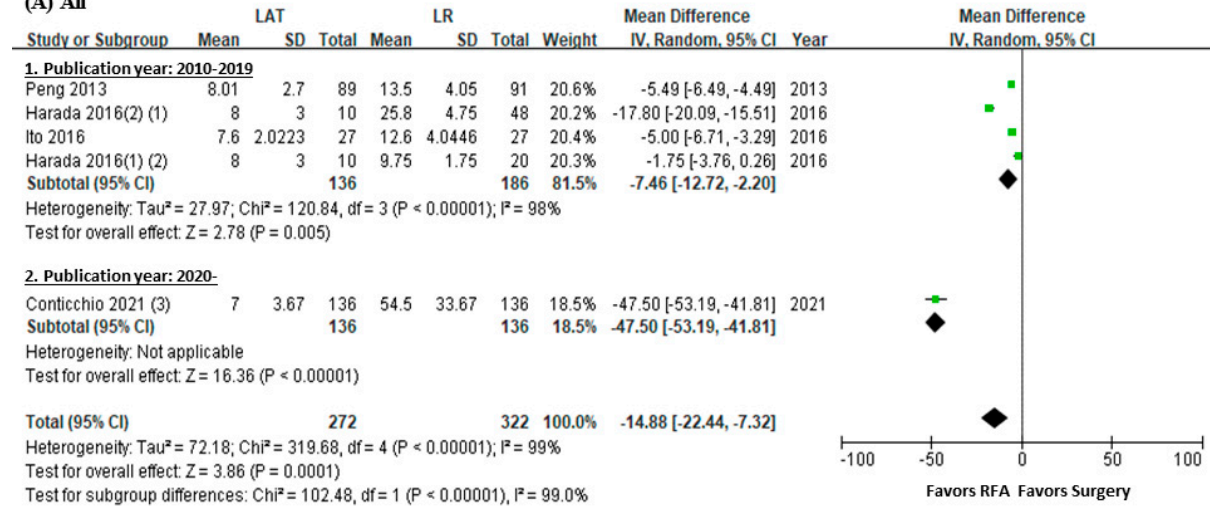

**(B) HCC  $\leq 3\text{cm}$**

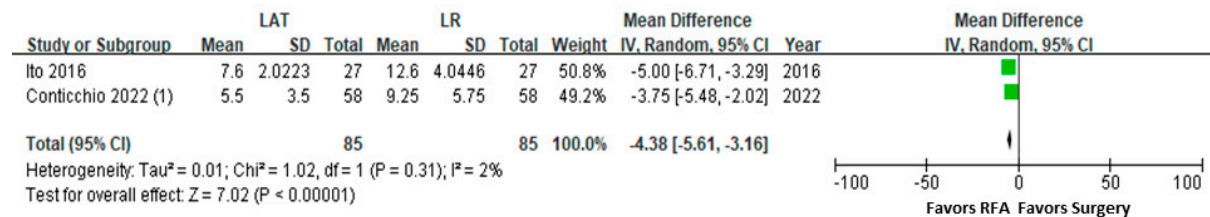

**Supplementary Figure S5.** Multivariate meta-analysis of overall mortality risk

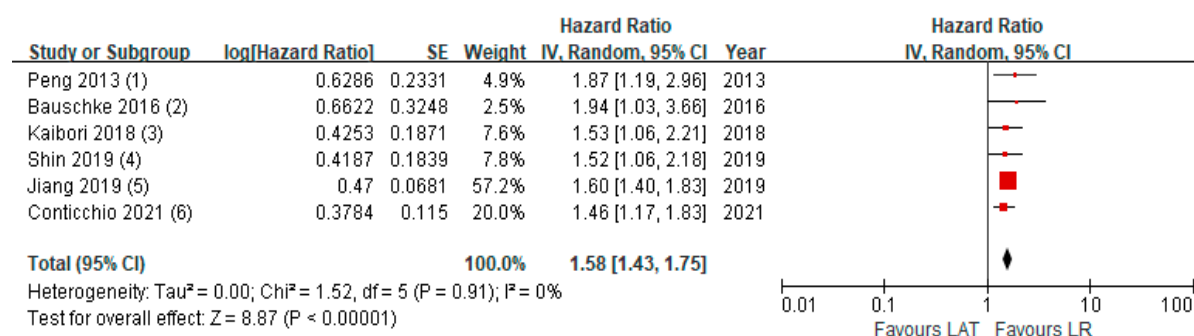

**Footnotes**

(1) Covariates : Tumor size, prothrombin activity

(2) Covariates : Charlson index, AFP, cirrhosis, Child's stage, Diameter of lesions, Number of lesions

(3) Covariates : age, sex, HBsAg, HCVAb, Child-Pugh class, serum albumin, total bilirubin, prothrombin activity, platelet, a-fetoprotein and...

(4) Covariates : Age, BMI, Albumin, Bilirubin, PT, Creatinine, Tumor number, tumor size, BCLC stages

(5) Covariates : Age, Tumor size, AFP, Fibrosis

(6) Covariates : INR, Multiple nodule, MELD

#### IV. References

1. Bauschke, A.; Altendorf-Hofmann, A.; Mothes, H.; Rauchfuss, F.; Settmacher, U. Partial liver resection results in a significantly better long-term survival than locally ablative procedures even in elderly patients. *J Cancer Res Clin Oncol* **2016**, *142*, 1099–1108, doi:10.1007/s00432-016-2115-6.
2. Conticchio, M.; Delvecchio, A.; Ratti, F.; Gelli, M.; Anelli, F.M.; Laurent, A.; Vitali, G.C.; Magistri, P.; Assirati, G.; Felli, E.; et al. Laparoscopic surgery versus radiofrequency ablation for the treatment of single hepatocellular carcinoma  $\leq 3$  cm in the elderly: a propensity score matching analysis. *HPB (Oxford)* **2022**, *24*, 79–86, doi:10.1016/j.hpb.2021.05.008.
3. Conticchio, M.; Inchingolo, R.; Delvecchio, A.; Laera, L.; Ratti, F.; Gelli, M.; Anelli, F.; Laurent, A.; Vitali, G.; Magistri, P.; et al. Radiofrequency ablation vs surgical resection in elderly patients with hepatocellular carcinoma in Milan criteria. *World J Gastroenterol* **2021**, *27*, 2205–2218, doi:10.3748/wjg.v27.i18.2205.
4. Delvecchio, A.; Inchingolo, R.; Laforgia, R.; Ratti, F.; Gelli, M.; Anelli, M.F.; Laurent, A.; Vitali, G.; Magistri, P.; Assirati, G.; et al. Liver resection vs radiofrequency ablation in single hepatocellular carcinoma of posterosuperior segments in elderly patients. *World J Gastrointest Surg* **2021**, *13*, 1696–1707, doi:10.4240/wjgs.v13.i12.1696.
5. Shin, J.; Yu, J.H.; Jin, Y.J.; Suh, Y.J.; Kim, D.H.; Byun, S.; Lee, J.W. Effective therapeutic options for elderly patients with hepatocellular carcinoma: A nationwide cohort study. *Medicine (Baltimore)* **2019**, *98*, e16150, doi:10.1097/MD.00000000000016150.
6. Jiang, Y.Q.; Wang, Z.X.; Deng, Y.N.; Yang, Y.; Wang, G.Y.; Chen, G.H. Efficacy of Hepatic Resection vs. Radiofrequency Ablation for Patients With Very-Early-Stage or Early-Stage Hepatocellular Carcinoma: A Population-Based Study With Stratification by Age and Tumor Size. *Front Oncol* **2019**, *9*, 113, doi:10.3389/fonc.2019.00113.
7. Kaibori, M.; Yoshii, K.; Hasegawa, K.; Ogawa, A.; Kubo, S.; Tateishi, R.; Izumi, N.; Kadoya, M.; Kudo, M.; Kumada, T.; et al. Treatment Optimization for Hepatocellular Carcinoma in Elderly Patients in a Japanese Nationwide Cohort. *Ann Surg* **2019**, *270*, 121–130, doi:10.1097/SLA.0000000000002751.
8. Harada, N.; Maeda, T.; Yoshizumi, T.; Ikeda, T.; Kayashima, H.; Ikegami, T.; Harimoto, N.; Takaki, S.; Maehara, Y. Laparoscopic Liver Resection Is a Feasible Treatment for Patients with Hepatocellular Carcinoma and Portal Hypertension. *Anticancer Res* **2016**, *36*, 3489–3497.
9. Ito, T.; Tanaka, S.; Iwai, S.; Takemura, S.; Hagihara, A.; Uchida-Kobayashi, S.; Shinkawa, H.; Nishioka, T.; Kawada, N.; Kubo, S. Outcomes of laparoscopic hepatic resection versus percutaneous radiofrequency ablation for hepatocellular carcinoma located at the liver surface: A case-control study with propensity score matching. *Hepatol Res* **2016**, *46*, 565–574, doi:10.1111/hepr.12592.
10. Liu, P.H.; Hsu, C.Y.; Lee, Y.H.; Hsia, C.Y.; Huang, Y.H.; Su, C.W.; Chiou, Y.Y.; Lin, H.C.; Huo, T.I. Uncompromised treatment efficacy in elderly patients with hepatocellular carcinoma: a propensity score analysis. *Medicine (Baltimore)* **2014**, *93*, e264, doi:10.1097/MD.0000000000000264.
11. Peng, Z.W.; Liu, F.R.; Ye, S.; Xu, L.; Zhang, Y.J.; Liang, H.H.; Lin, X.J.; Lau, W.Y.; Chen, M.S. Radiofrequency ablation versus open hepatic resection for elderly patients (> 65 years) with very early or early hepatocellular carcinoma. *Cancer* **2013**, *119*, 3812–3820, doi:10.1002/cncr.28293.
12. Massarweh, N.N.; Park, J.O.; Yeung, R.S.; Flum, D.R. Comparative assessment of the safety and effectiveness of radiofrequency ablation among elderly medicare beneficiaries with hepatocellular carcinoma. *Ann Surg Oncol* **2012**, *19*, 1058–1065, doi:10.1245/s10434-011-2067-7.
13. Mirici-Cappa, F.; Gramenzi, A.; Santi, V.; Zambruni, A.; Di Micoli, A.; Frigerio, M.; Maraldi, F.; Di Nolfo, M.A.; Del Poggio, P.; Benvegna, L.; et al. Treatments for hepatocellular carcinoma in elderly patients are as effective as in younger patients: a 20-year multicentre experience. *Gut* **2010**, *59*, 387–396, doi:10.1136/gut.2009.194217.
